# Supplementary material for: In situ mass change and gas analysis of 3D manganese oxide/graphene aerogel for supercapacitors
Source: Royal Society of Chemistry journal article supplement (doi:10.1039/c9ra05444h), 2019-01-01
Supplement: c9ra05444h1.pdf [file c9ra05444h1.pdf]

## Supporting Information

### ***In situ* mass change and gas analysis of 3D manganese oxide/graphene aerogel for supercapacitors**

Phansiri Suktha<sup>a,b</sup>, Poramane Chiochan<sup>a,b</sup>, Atiweena Krittayavathananon<sup>a,b</sup>, Sangchai Sarawutanukul<sup>a,b</sup>, Sethuraman Sathyamoorthi<sup>a,b</sup> and Montree Sawangphruk<sup>a,b,\*</sup>

<sup>a</sup>Department of Chemical and Biomolecular Engineering, School of Energy Science and Engineering, Vidyasirimedhi Institute of Science and Technology, Rayong 21210, Thailand

<sup>b</sup>Centre of Excellence for Energy Storage Technology (CEST), Vidyasirimedhi Institute of Science and Technology, Rayong 21210, Thailand

\**E-mail address: montree.s@vistec.ac.th (M. Sawangphruk)*

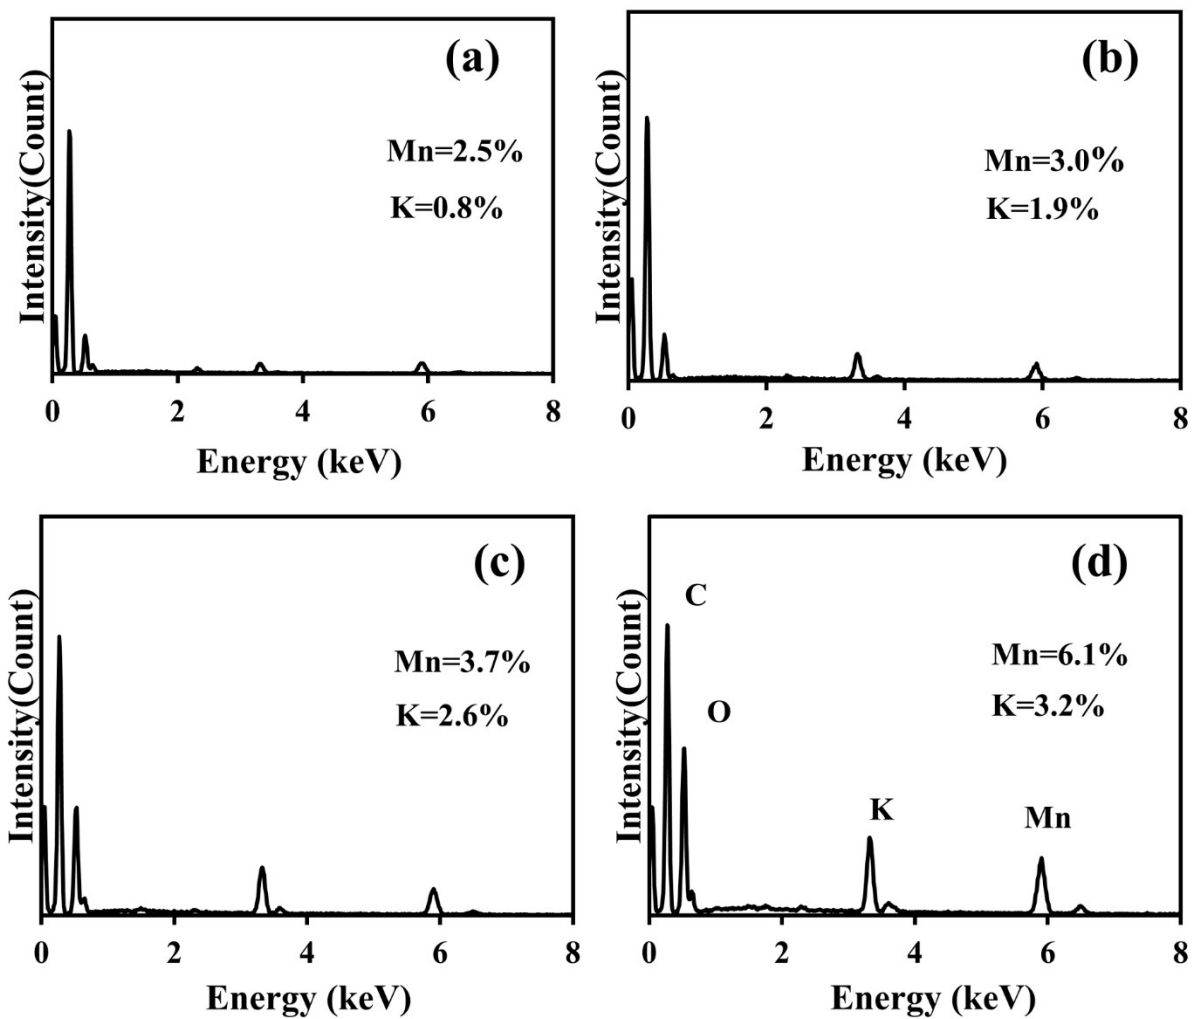

**Figure S1.** EDS spectra of 3D MnO<sub>x</sub>/rGO<sub>ac</sub> with different GO:KMnO<sub>4</sub> precursor weight ratios at (a) 8:1, (b) 4:1, (c) 2:1, and (d) 1:1.

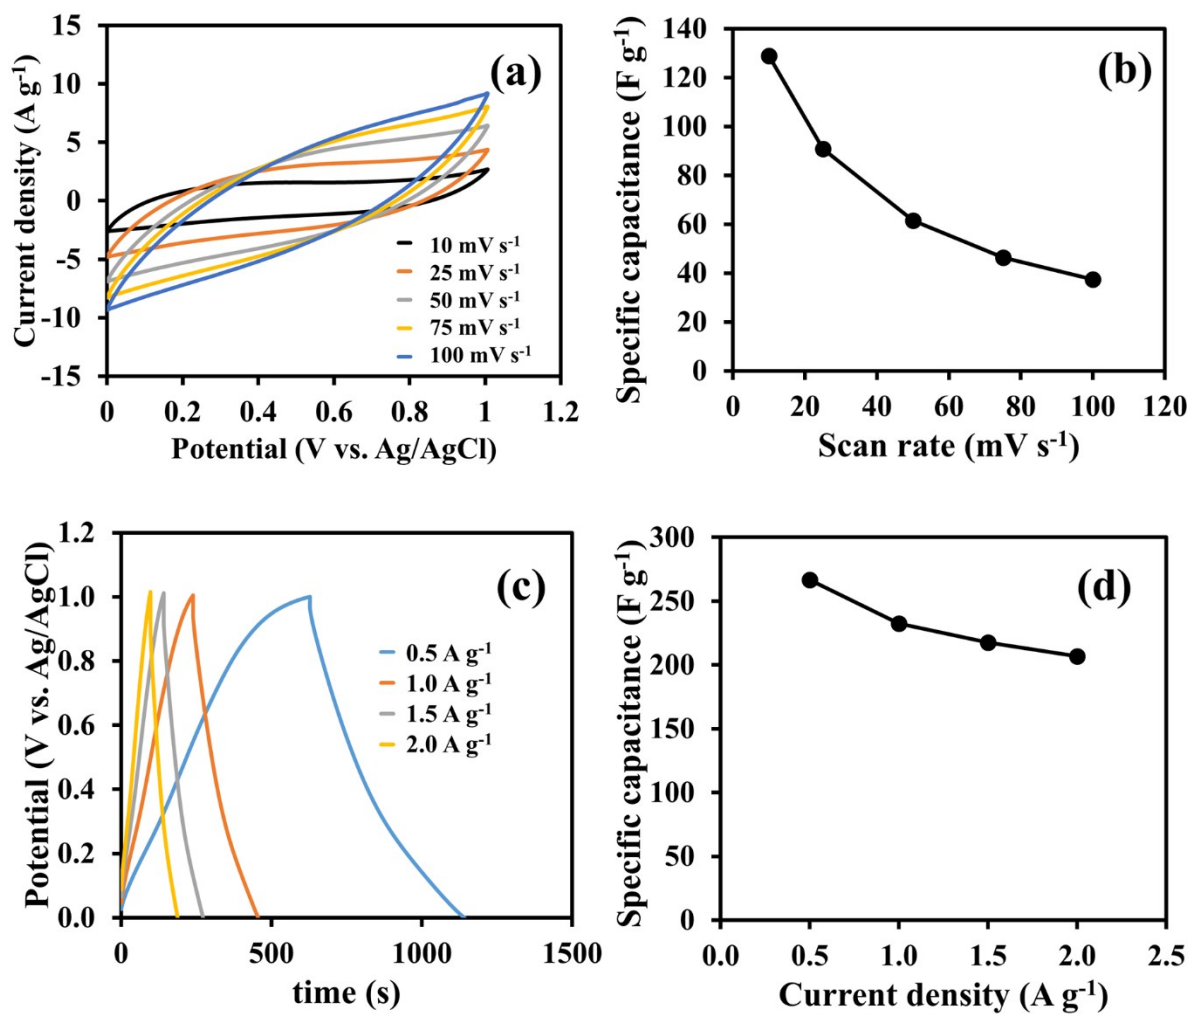

**Figure S2.** (a) CV curves, (b) specific capacitance calculated from CV, (c) GCD curves, and (d) specific capacitance calculated from GCD of 3D MnO<sub>x</sub>/rGO<sub>ac</sub> in 1 M Na<sub>2</sub>SO<sub>4</sub> electrolyte.
